# Supplementary material for: Enhanced visible light photocatalysis over Pt-loaded Bi2O3: an insight into its photogenerated charge separation, transfer and capture
Source: Royal Society of Chemistry journal article supplement (doi:10.1039/c6cp06755g), 2016-11-15
Supplement: c6cp06755g1.pdf [file c6cp06755g1.pdf]

## Electronic supplementary information (ESI)

**Fig. S1** Full-scale XPS spectra of pure  $\text{Bi}_2\text{O}_3$  and 0.075 wt%  $\text{Pt}/\text{Bi}_2\text{O}_3$ .

**Fig. S2** Cyclic use of 0.075 wt%  $\text{Pt}/\text{Bi}_2\text{O}_3$  for photocatalytic degradation of RhB.

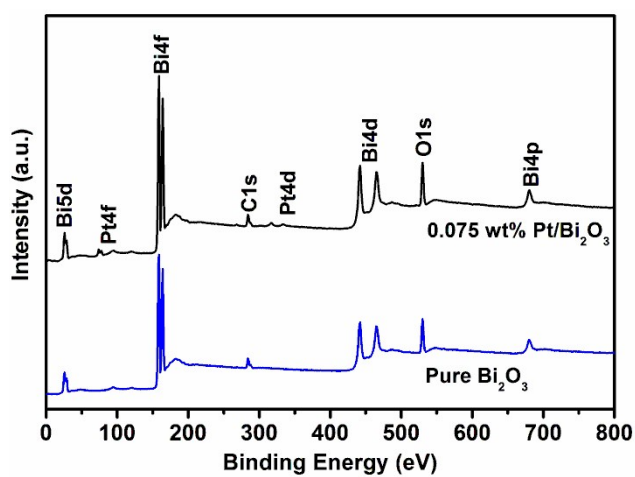

**Fig. S1**

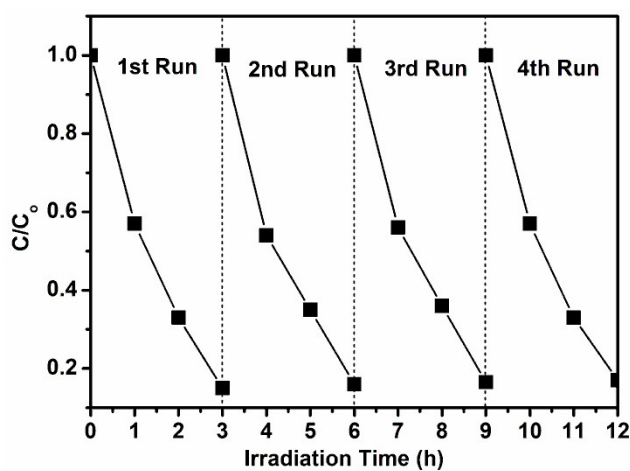

**Fig. S2**
